# Supplementary material for: ABCG2, a novel antigen to sort luminal progenitors of BRCA1- breast cancer cells
Source: PubMed Central journal article supplement (PMC4176869; doi:10.1186/1476-4598-13-213), 2014-09-12
Supplement: 12943_2014_1419_MOESM1_ESM.pdf [file 12943_2014_1419_MOESM1_ESM.pdf]

Additional file 1: Table S1

| <b>Tube</b> | <b>FITC</b> | <b>PE</b> | <b>PE/Cy7</b> | <b>AlexaFluor647</b> |
|-------------|-------------|-----------|---------------|----------------------|
| <b>1</b>    | CD49f       | CD338     | CD44          | CD24                 |
| <b>2</b>    | CD90        | CD133     | CD44          | CD24                 |
| <b>3</b>    | CD47        | CD200     | CD44          | CD24                 |
| <b>4</b>    | CD227       | CD10      | CD44          | CD24                 |
| <b>5</b>    | CD324       | CD29      | CD44          | CD24                 |
| <b>6</b>    | CD66c       | CD61      | CD44          | CD24                 |
| <b>7</b>    | CD49b       | CD184     | CD44          | CD24                 |
| <b>8</b>    | CD164       | CD340     | CD44          | CD24                 |
| <b>9</b>    | CD9         | CD54      | CD44          | CD24                 |
| <b>10</b>   | CD26        | CD55      | CD44          | CD24                 |
| <b>11</b>   | CD81        | CD151     | CD44          | CD24                 |
| <b>12</b>   | CD66b       | CD59      | CD44          | CD24                 |
| <b>13</b>   | CD165       | CD166     | CD44          | CD24                 |
| <b>14</b>   | CD326       | CD105     | CD44          | CD24                 |
