# Supplementary material for: ABCG2, a novel antigen to sort luminal progenitors of BRCA1- breast cancer cells
Source: PubMed Central journal article supplement (PMC4176869; doi:10.1186/1476-4598-13-213), 2014-09-12

Additional file 2: Figure S1

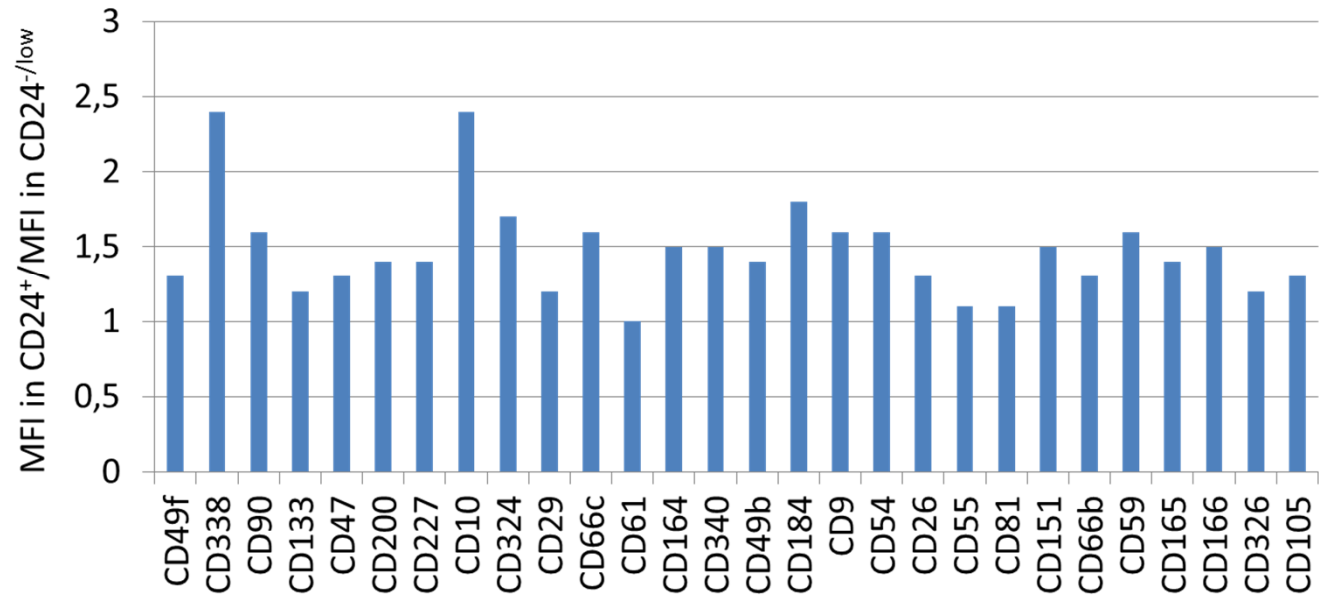

Supplement: 12943_2014_1419_MOESM2_ESM.pdf [file 12943_2014_1419_MOESM2_ESM.pdf]
